# Supplementary material
Source: Atypon-hosted journal article supplement (doi:10.1287/opre.2024.0761)

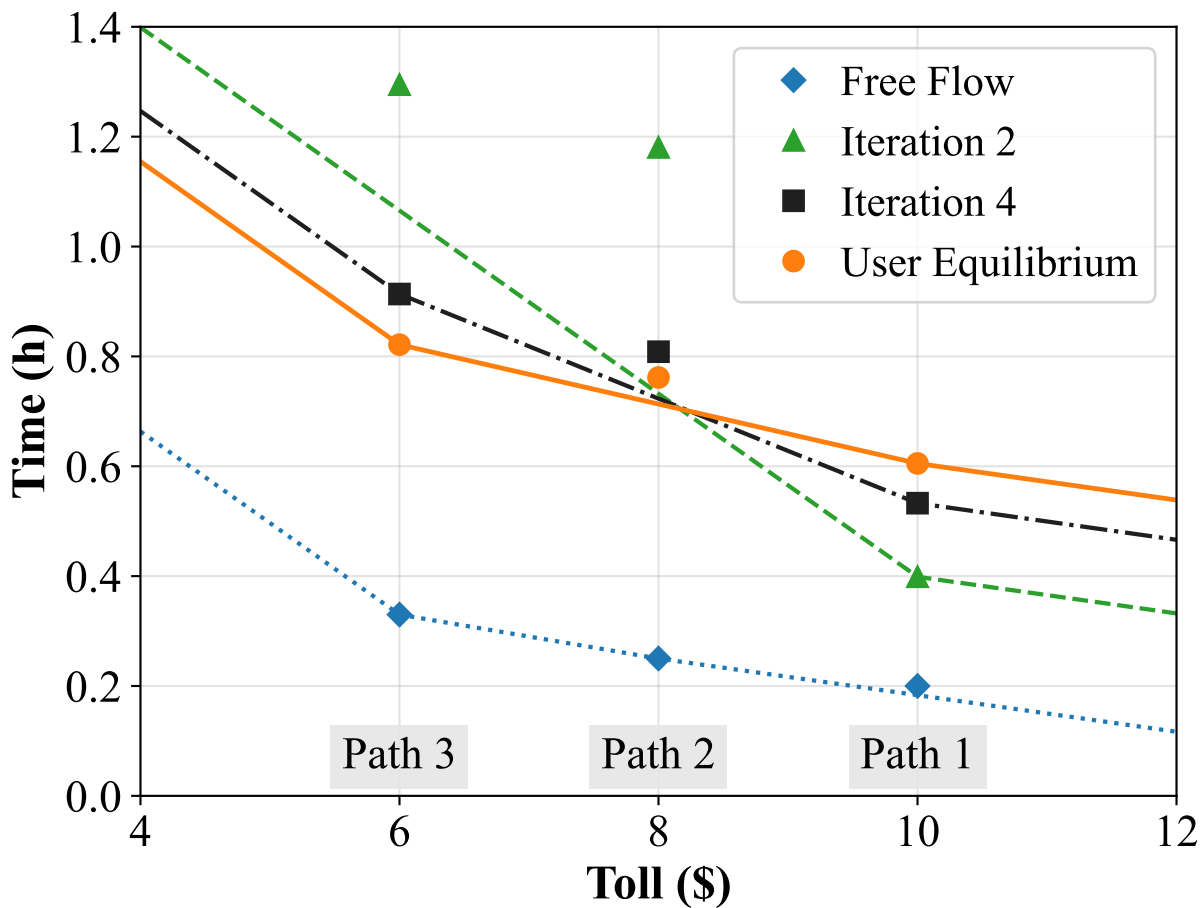

Supplement: opre.2024.0761.cd.zip [file br_frontier.pdf › 2024.0761-1.0/results/figures/br_frontier.pdf]

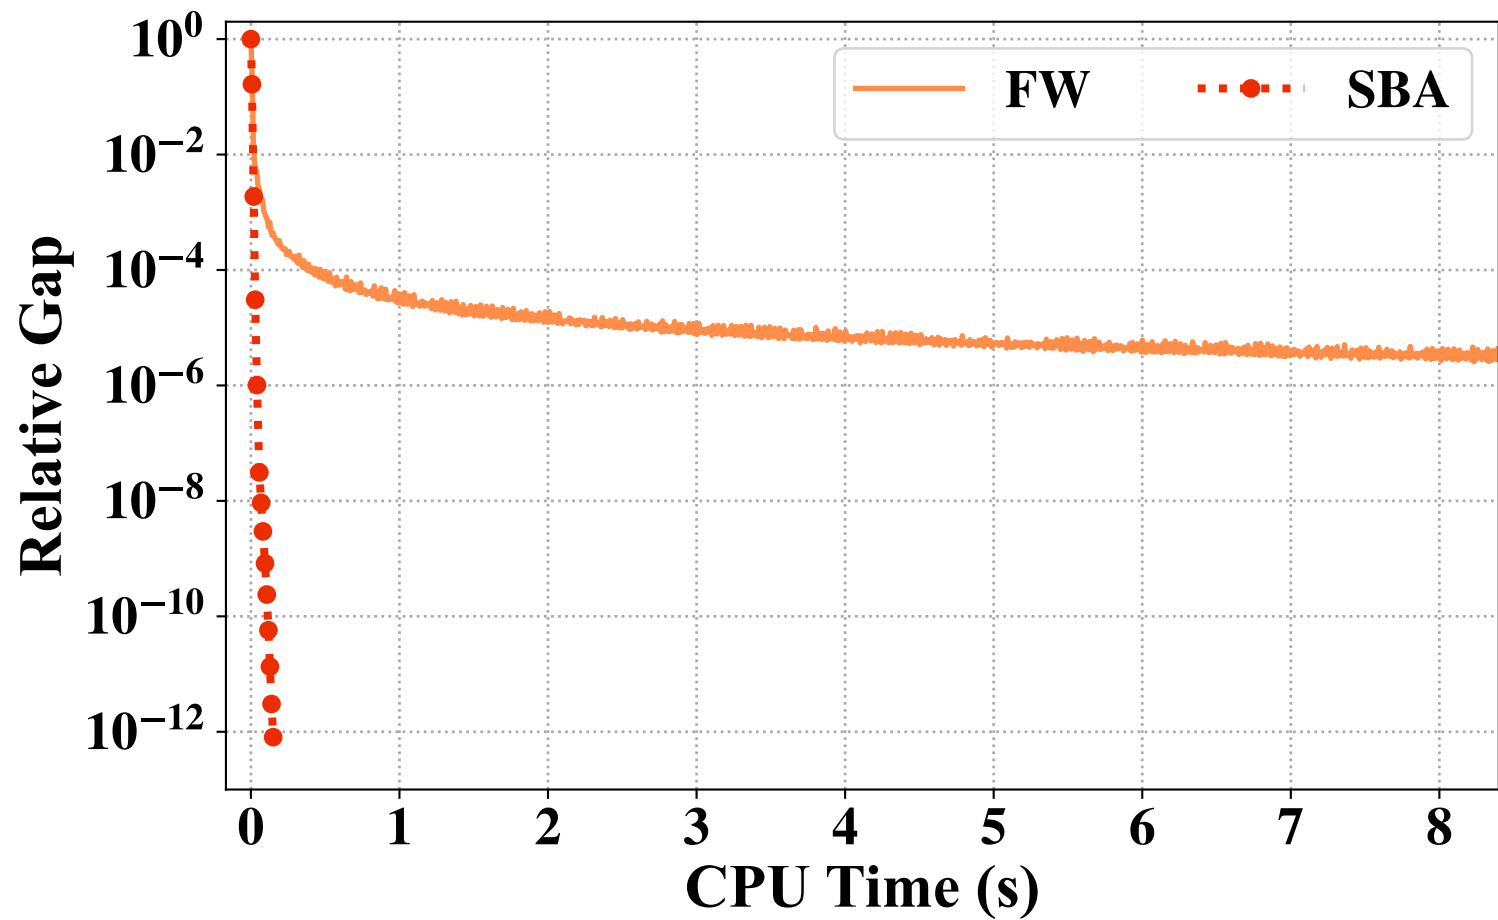

Supplement: opre.2024.0761.cd.zip [file Anaheim_conv.pdf › 2024.0761-1.0/results/figures/convergence_test/Anaheim_conv.pdf]

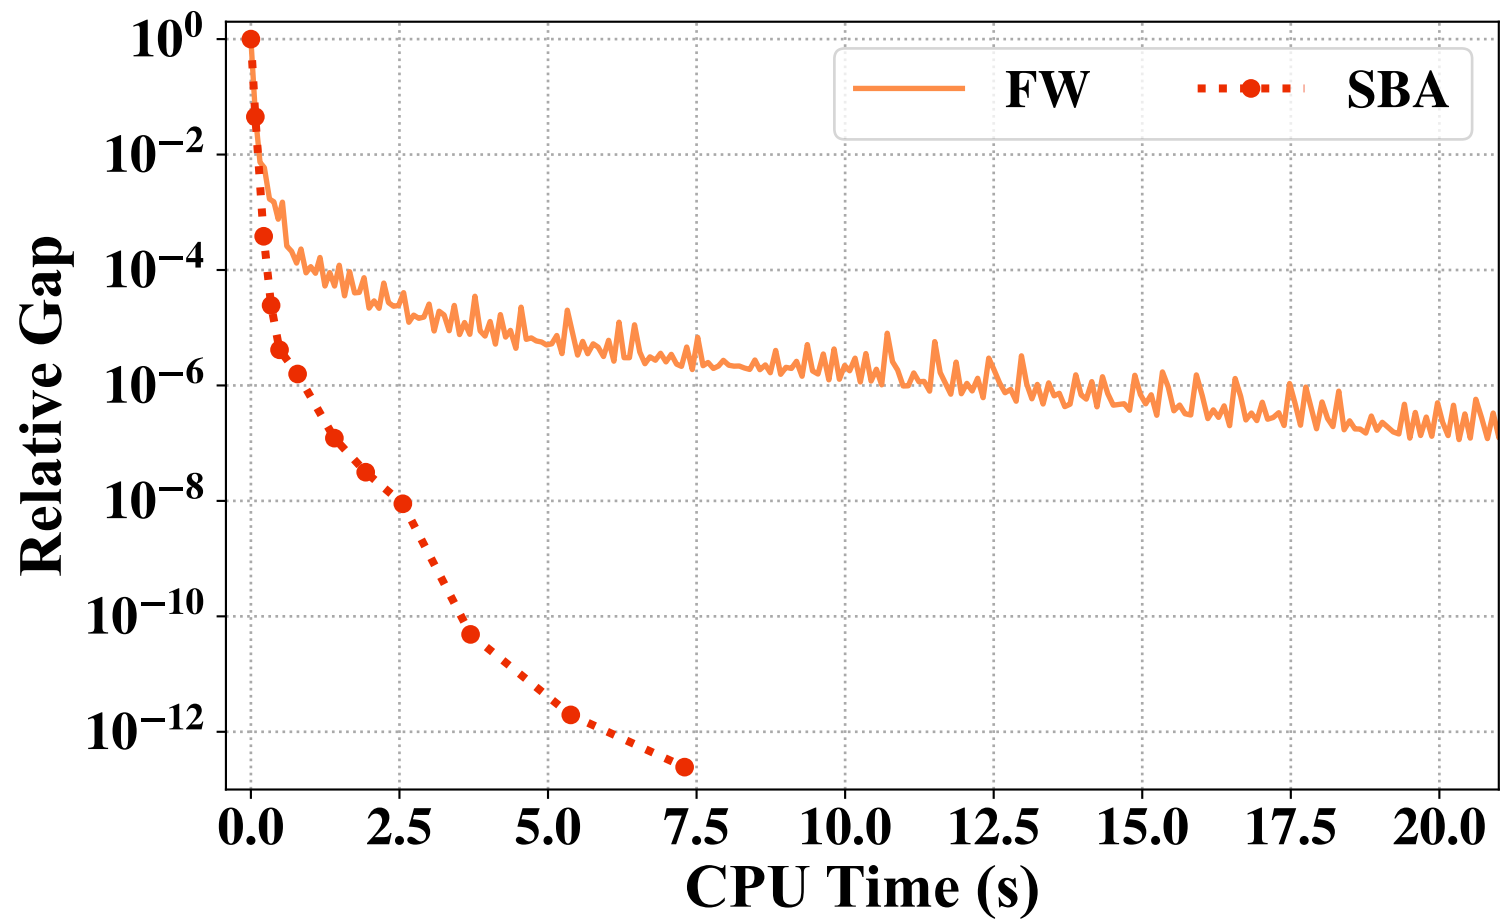

Supplement: opre.2024.0761.cd.zip [file Barcelona_conv.pdf › 2024.0761-1.0/results/figures/convergence_test/Barcelona_conv.pdf]

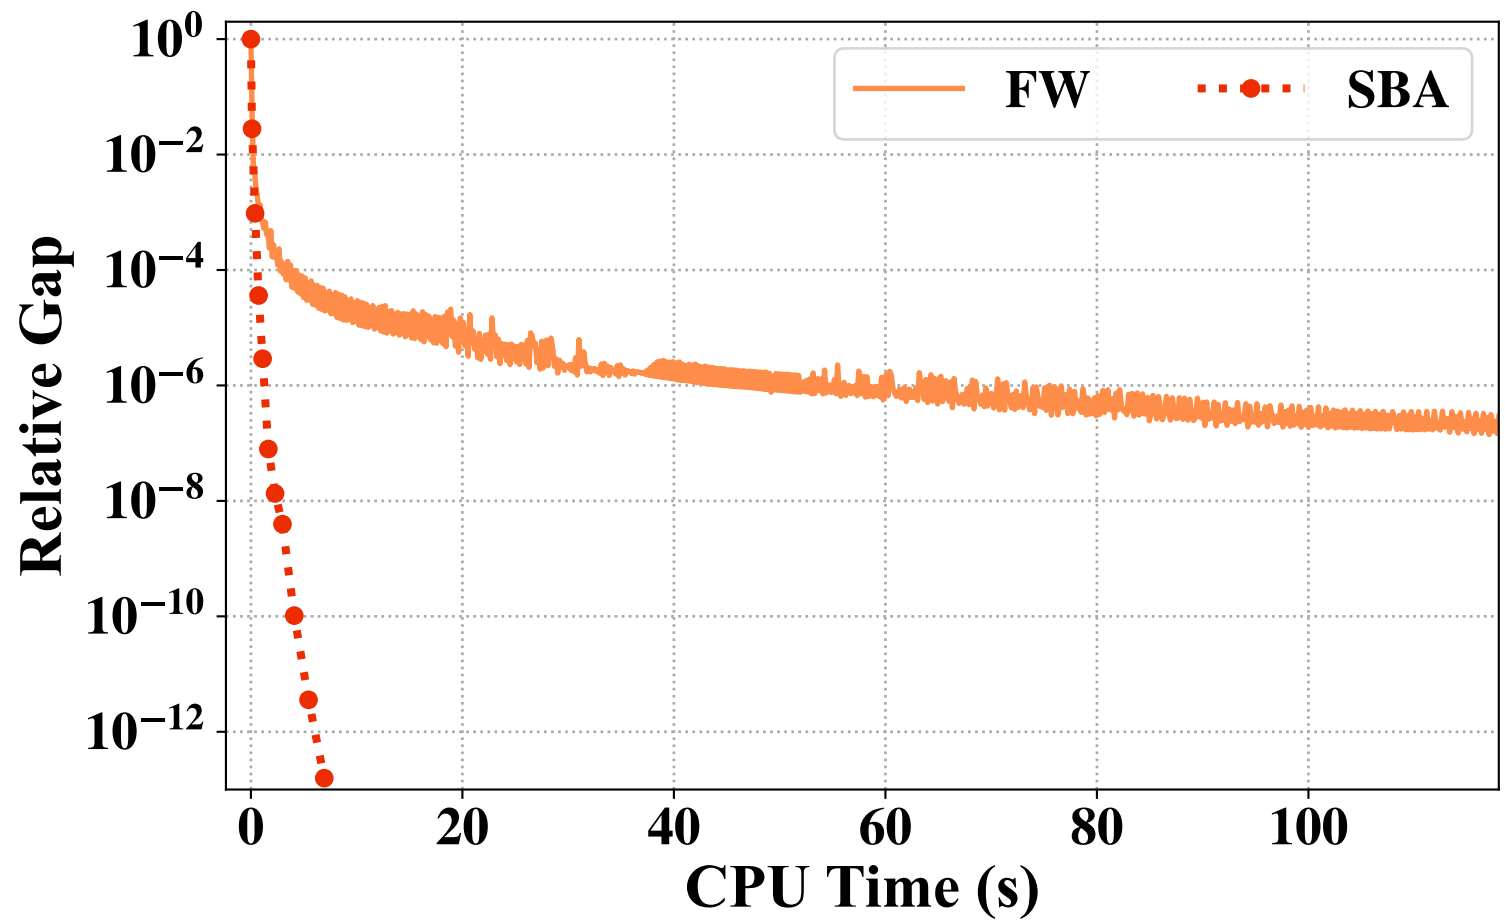

Supplement: opre.2024.0761.cd.zip [file Winnipeg_conv.pdf › 2024.0761-1.0/results/figures/convergence_test/Winnipeg_conv.pdf]

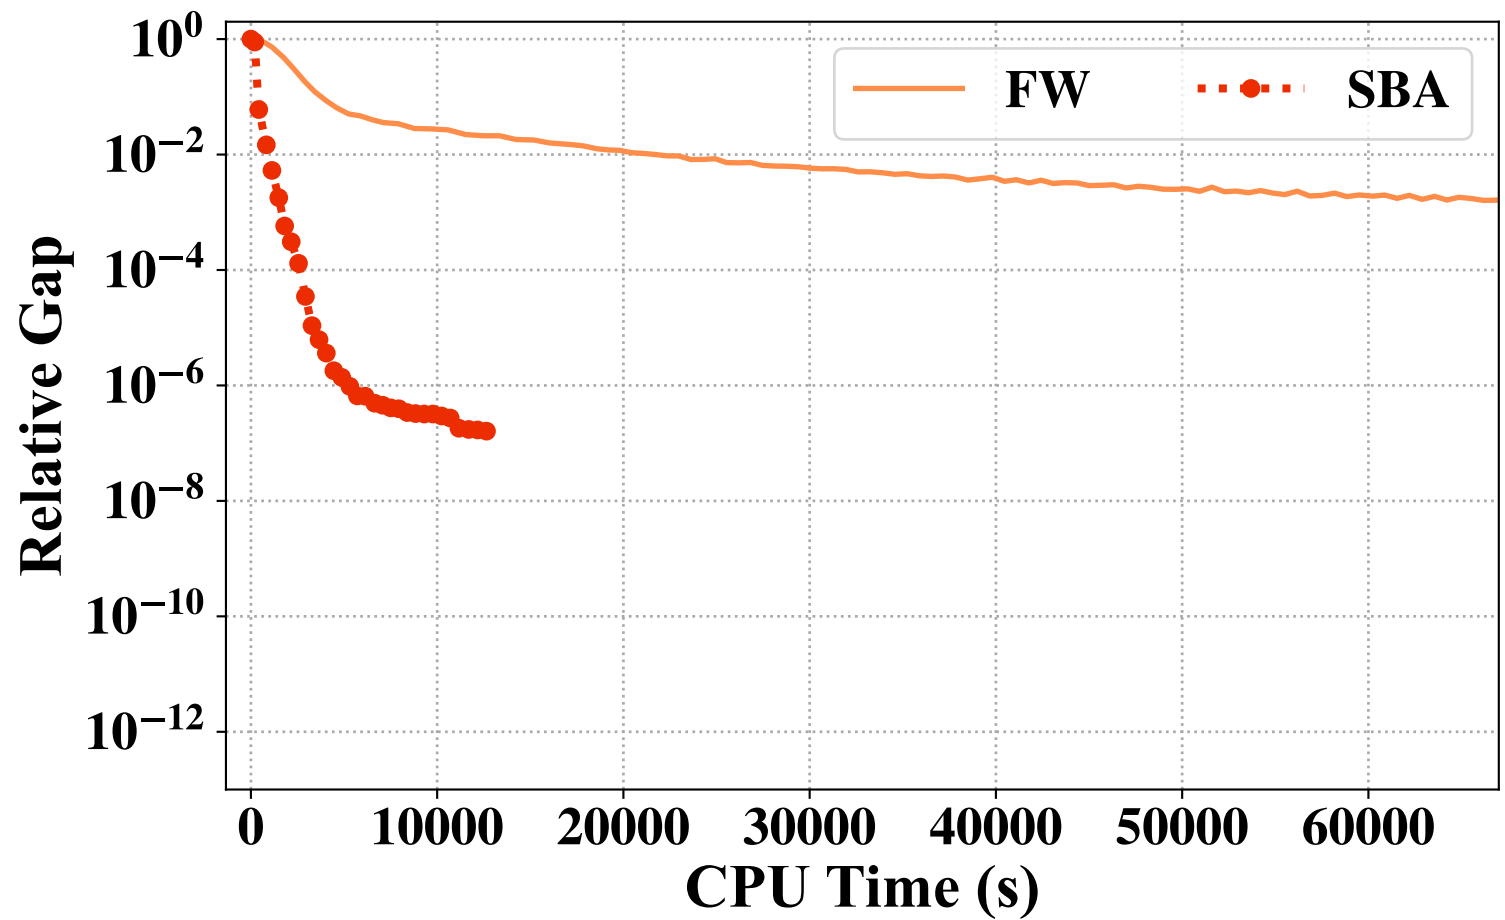

Supplement: opre.2024.0761.cd.zip [file chi_conv.pdf › 2024.0761-1.0/results/figures/convergence_test/chi_conv.pdf]

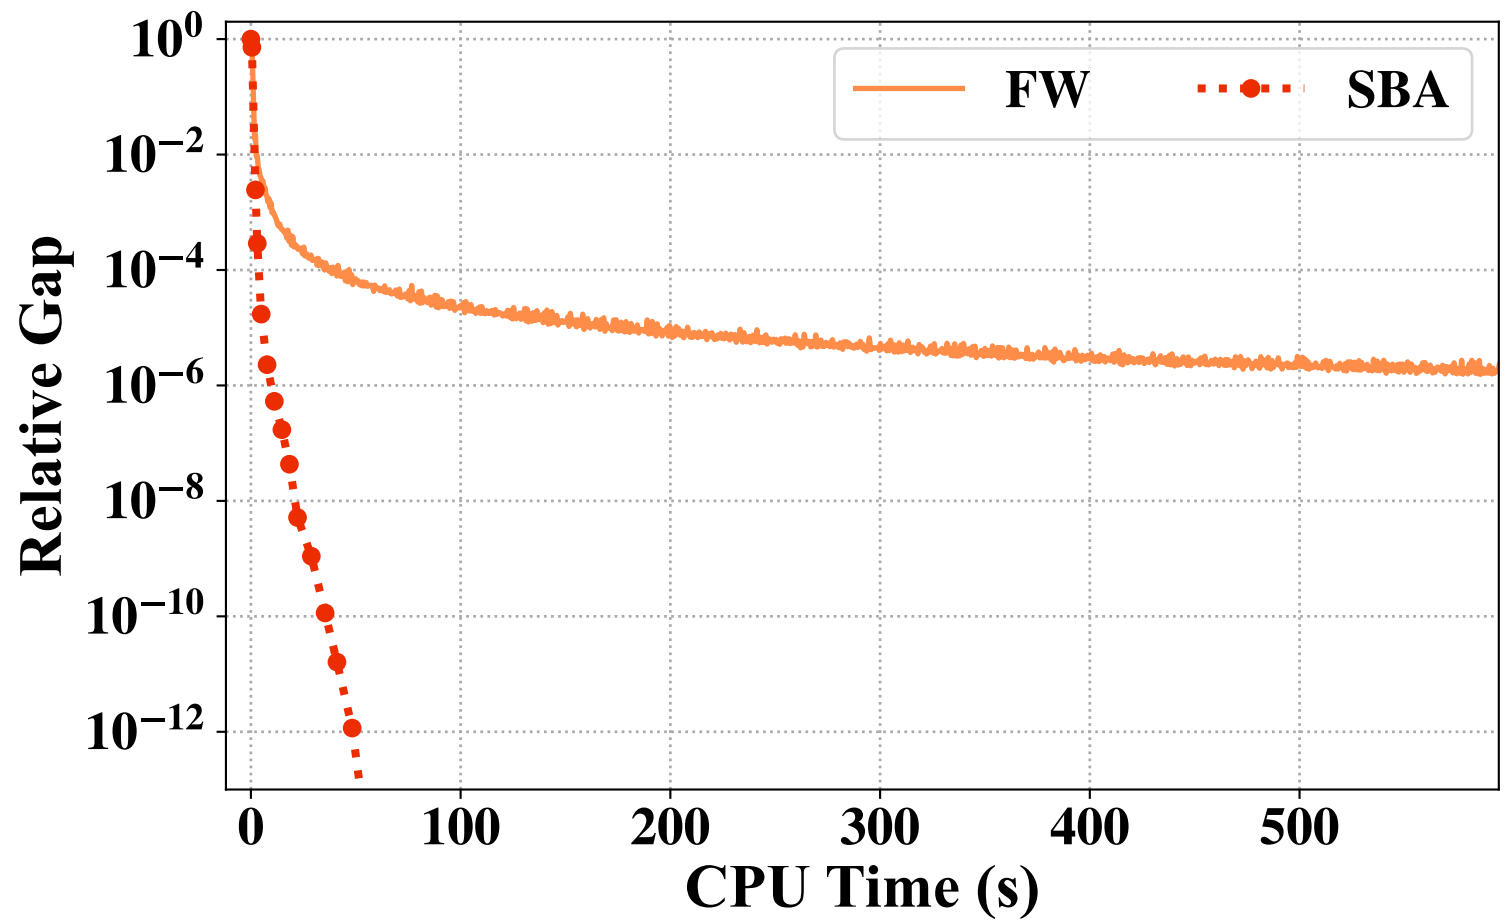

Supplement: opre.2024.0761.cd.zip [file chicagosketch_conv.pdf › 2024.0761-1.0/results/figures/convergence_test/chicagosketch_conv.pdf]

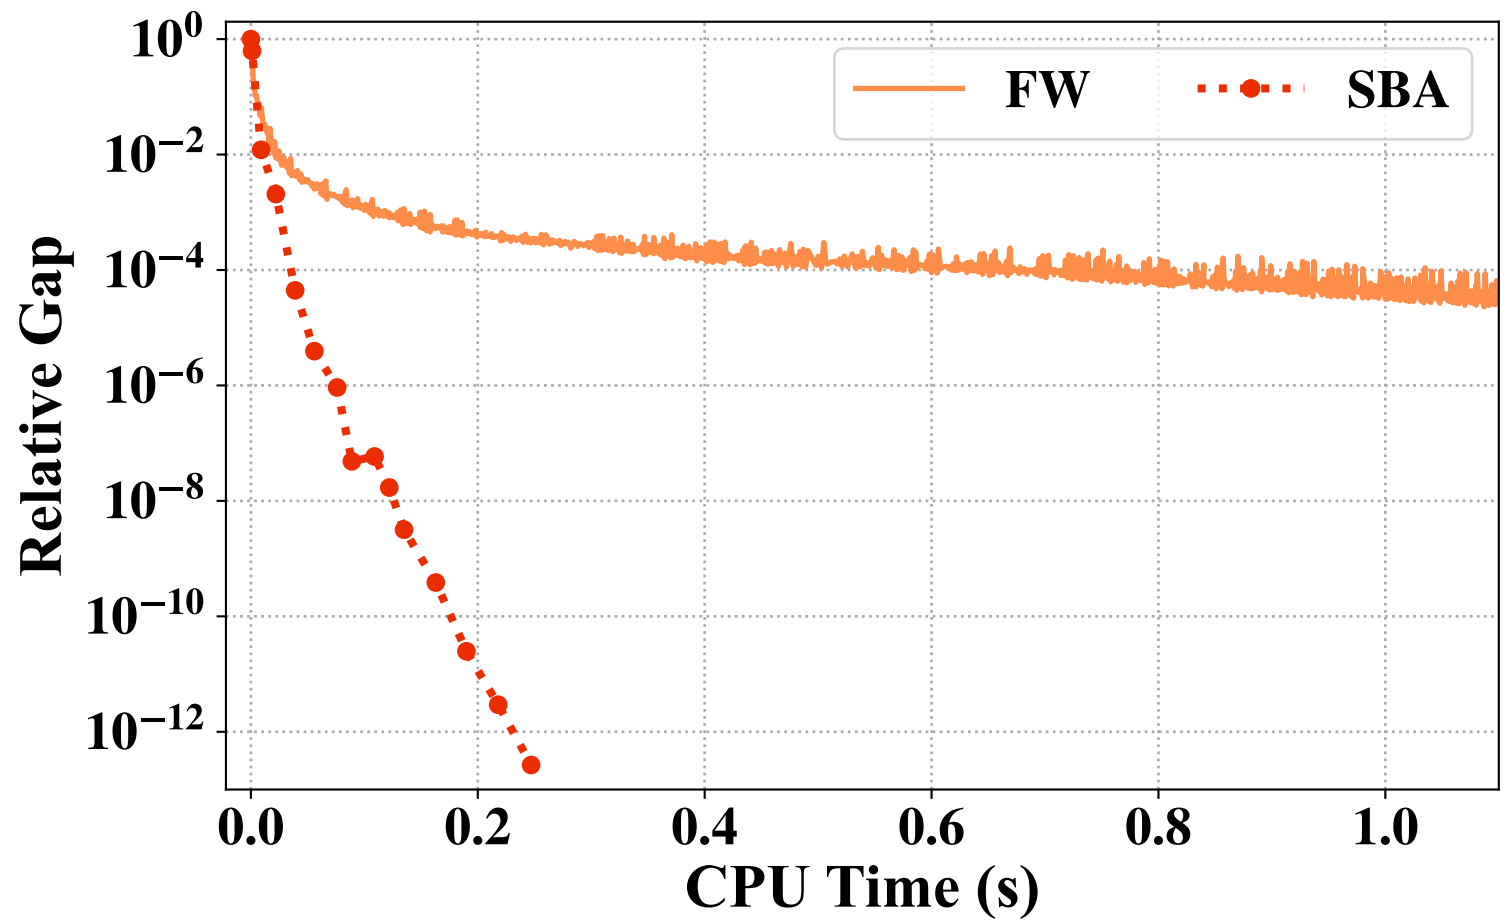

Supplement: opre.2024.0761.cd.zip [file sf_conv.pdf › 2024.0761-1.0/results/figures/convergence_test/sf_conv.pdf]

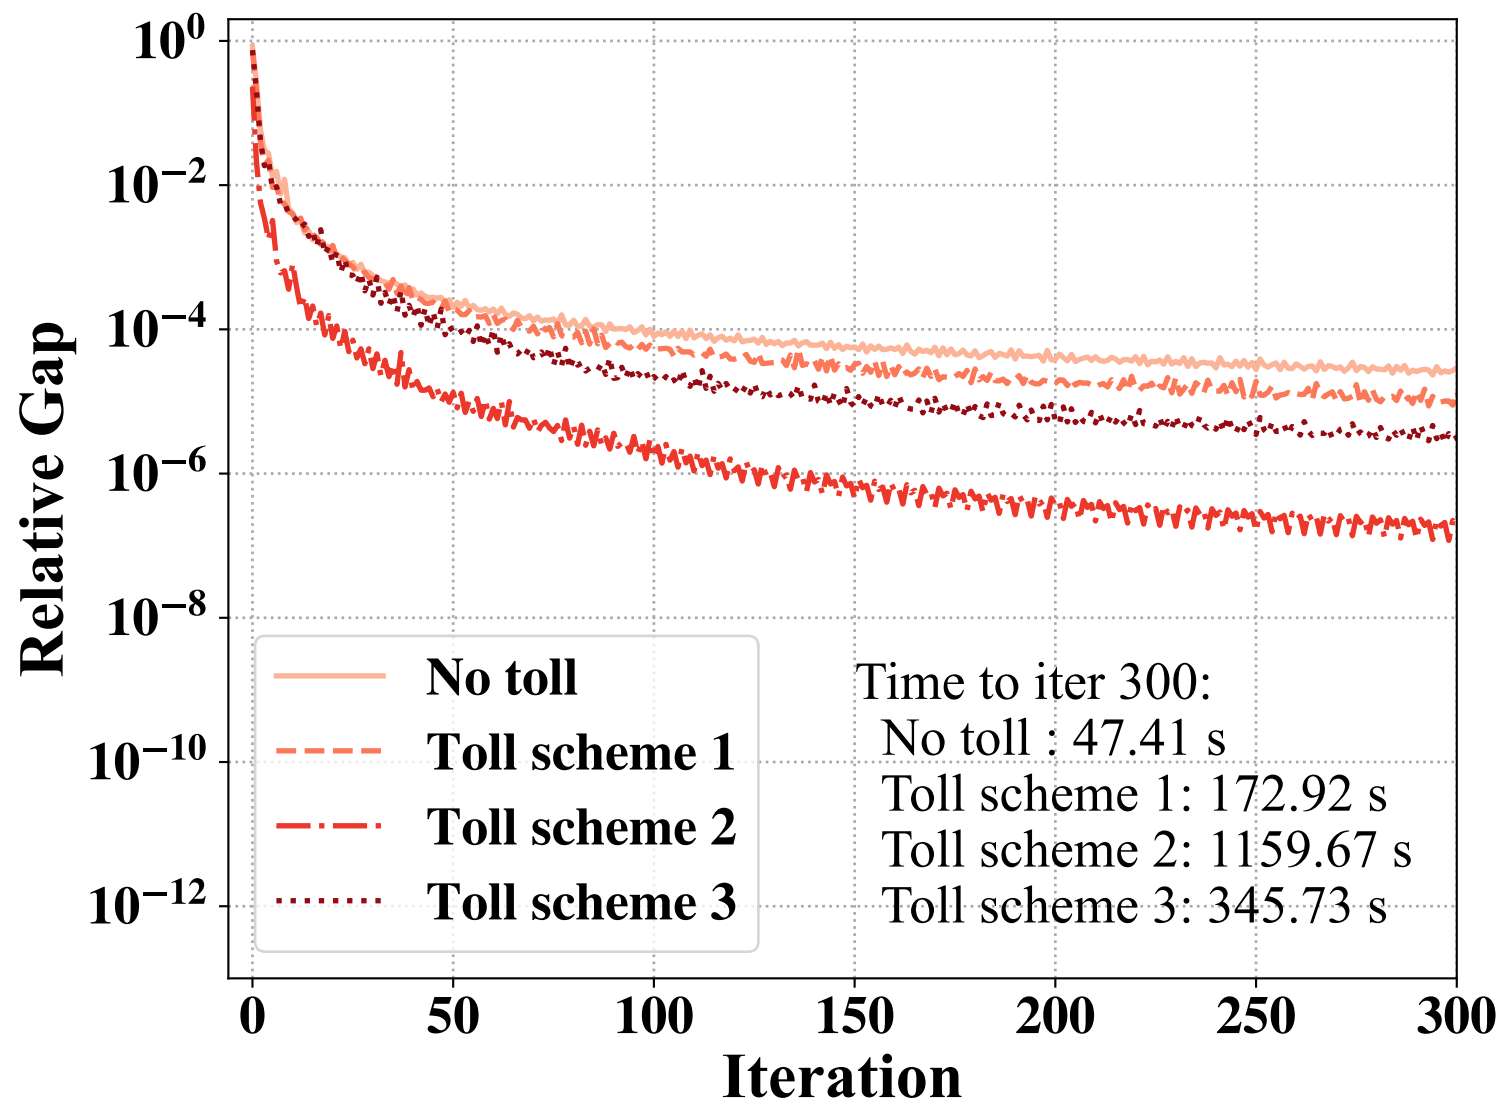

Supplement: opre.2024.0761.cd.zip [file FW.pdf › 2024.0761-1.0/results/figures/num_of_tolled_links/FW.pdf]

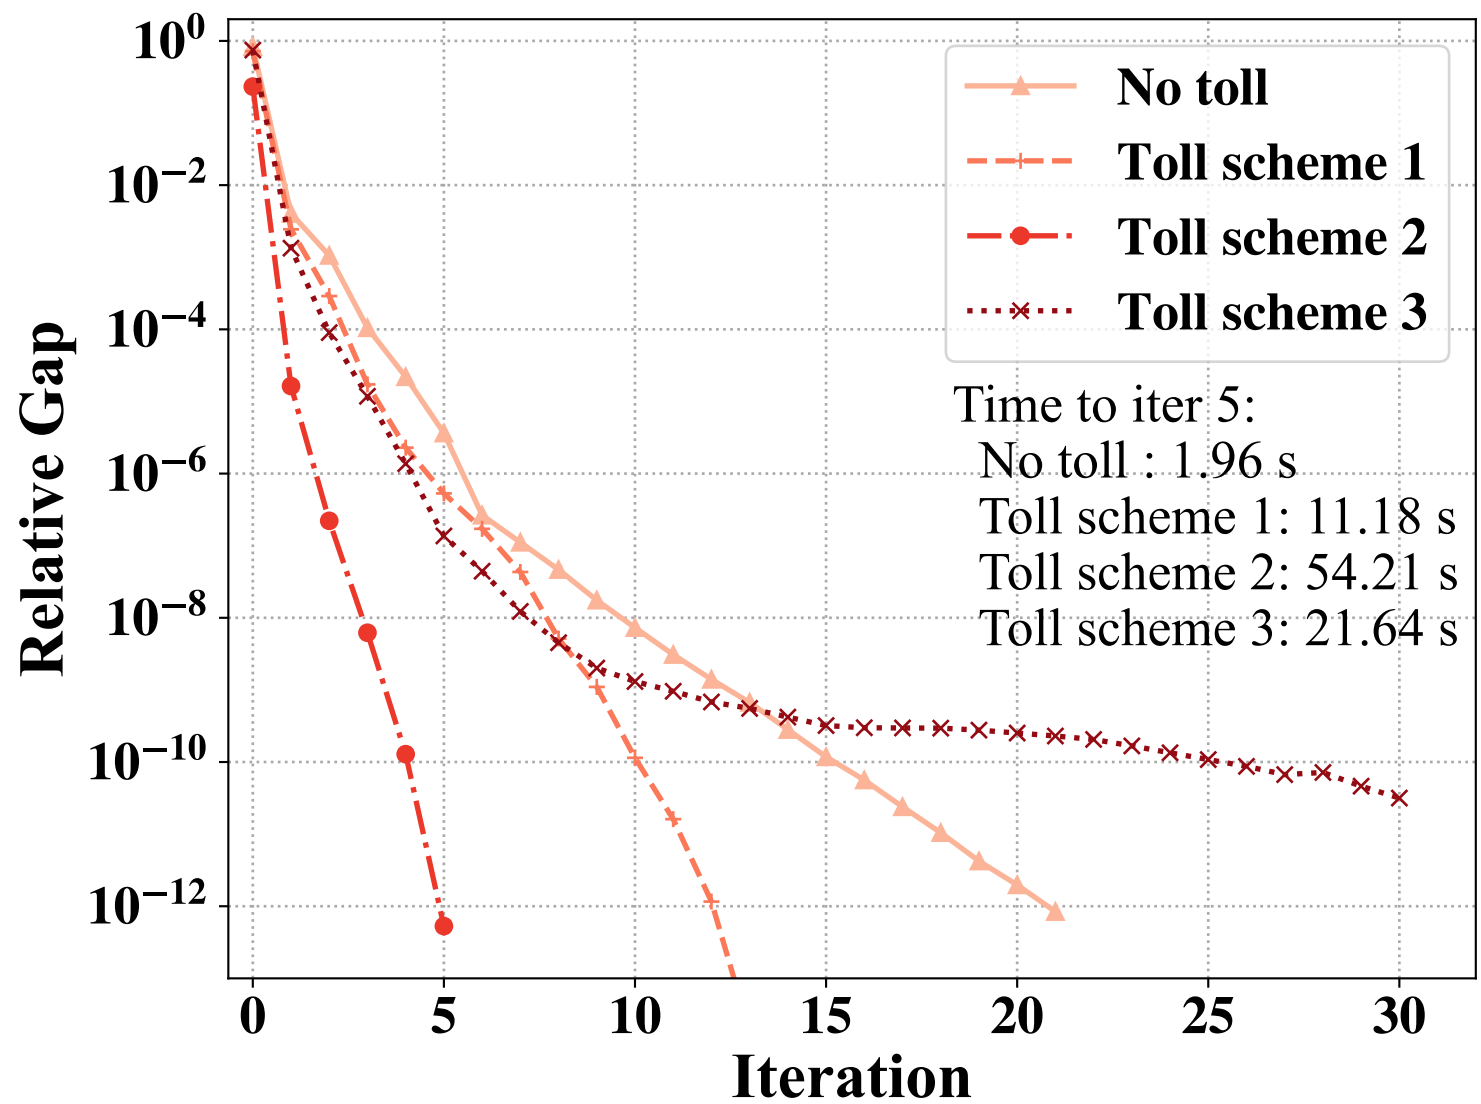

Supplement: opre.2024.0761.cd.zip [file SBA.pdf › 2024.0761-1.0/results/figures/num_of_tolled_links/SBA.pdf]

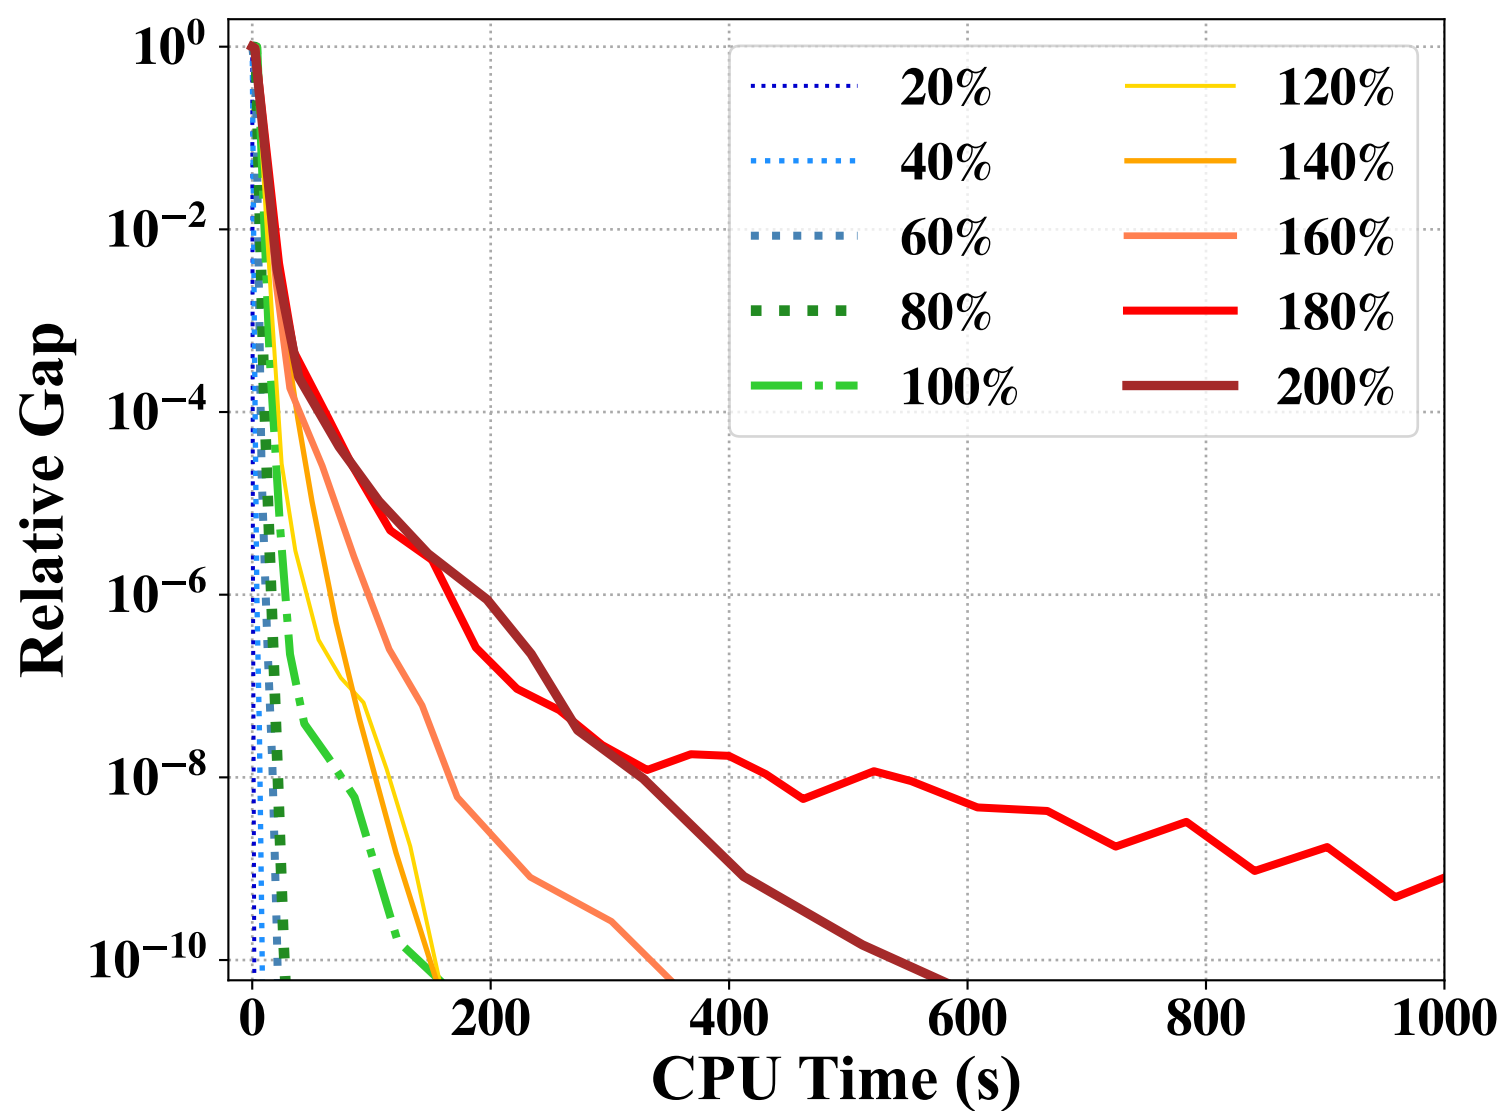

Supplement: opre.2024.0761.cd.zip [file demand_change.pdf › 2024.0761-1.0/results/figures/sens_congestion/demand_change.pdf]

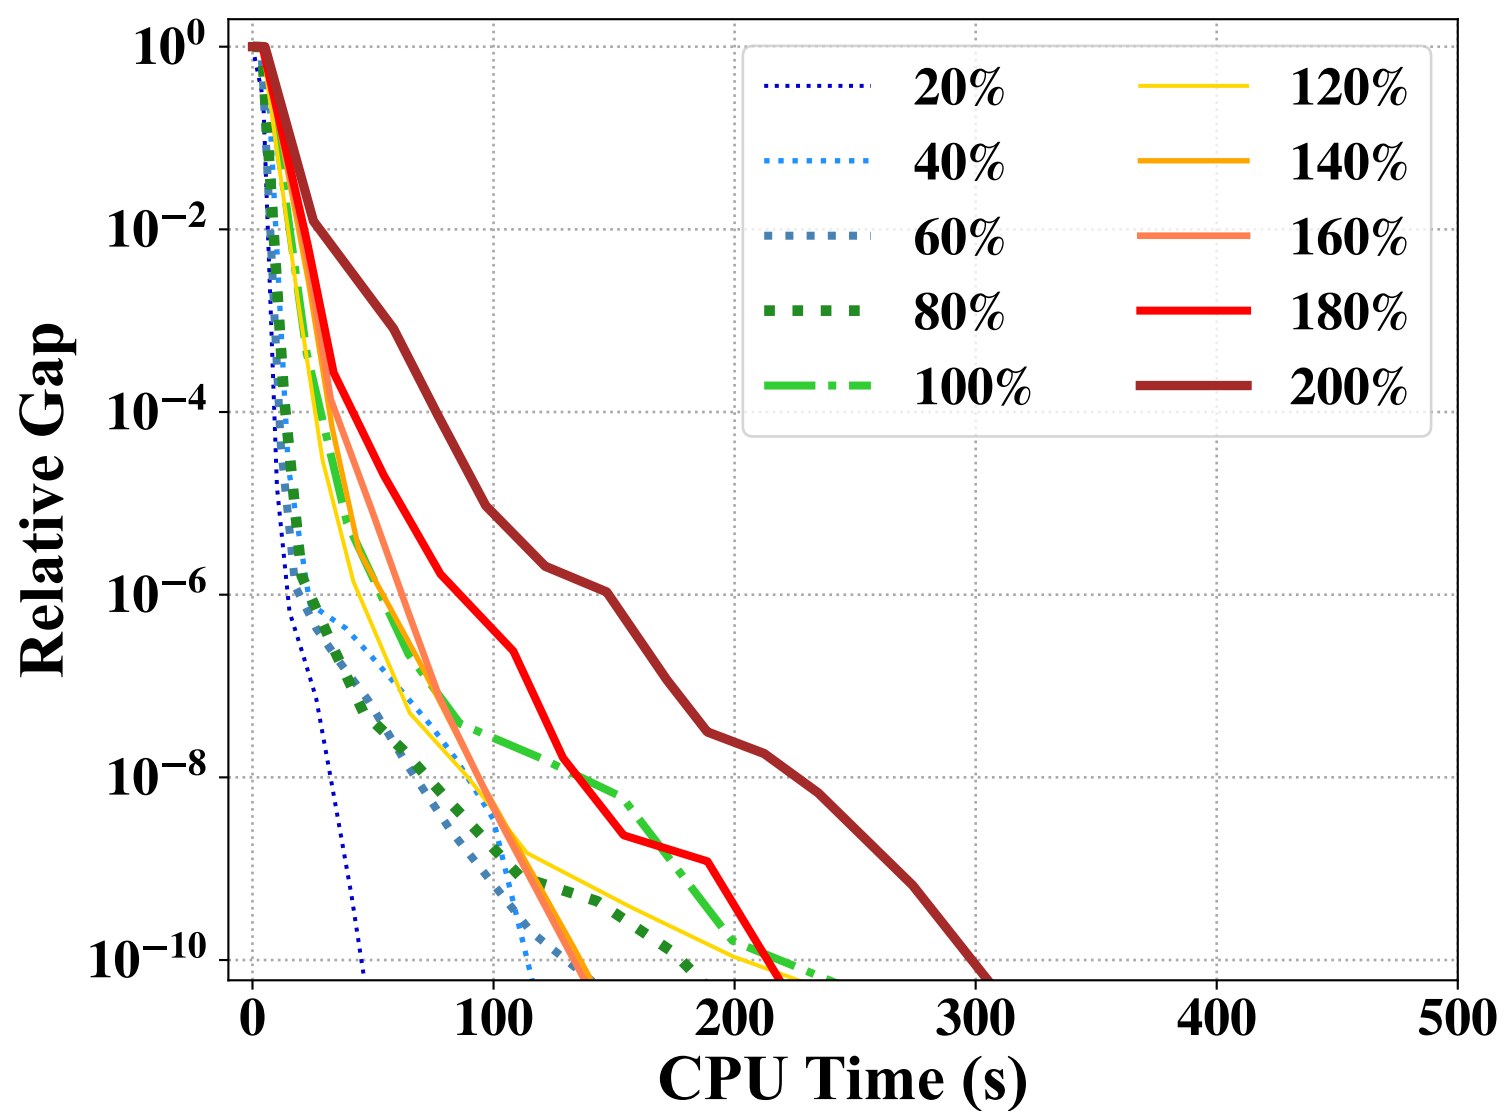

Supplement: opre.2024.0761.cd.zip [file demand_constant.pdf › 2024.0761-1.0/results/figures/sens_congestion/demand_constant.pdf]

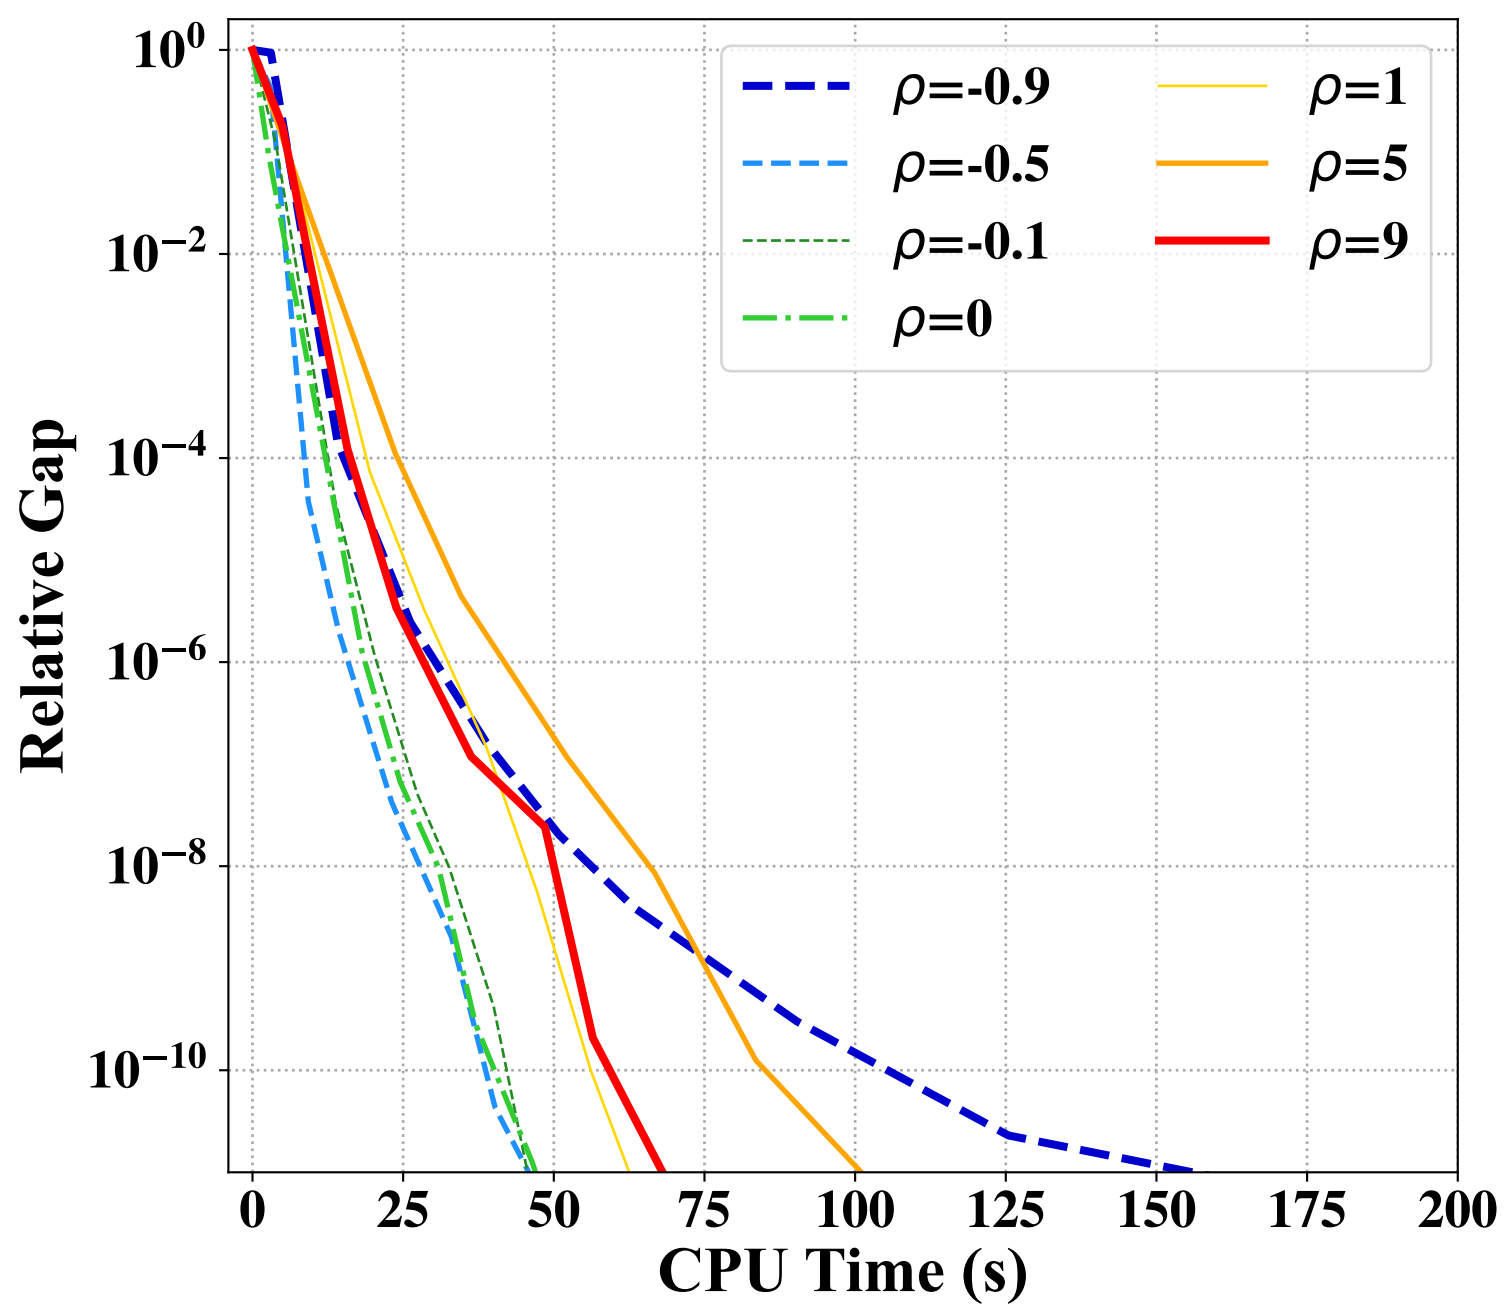

Supplement: opre.2024.0761.cd.zip [file distribution_iter.pdf › 2024.0761-1.0/results/figures/sens_dist/distribution_iter.pdf]

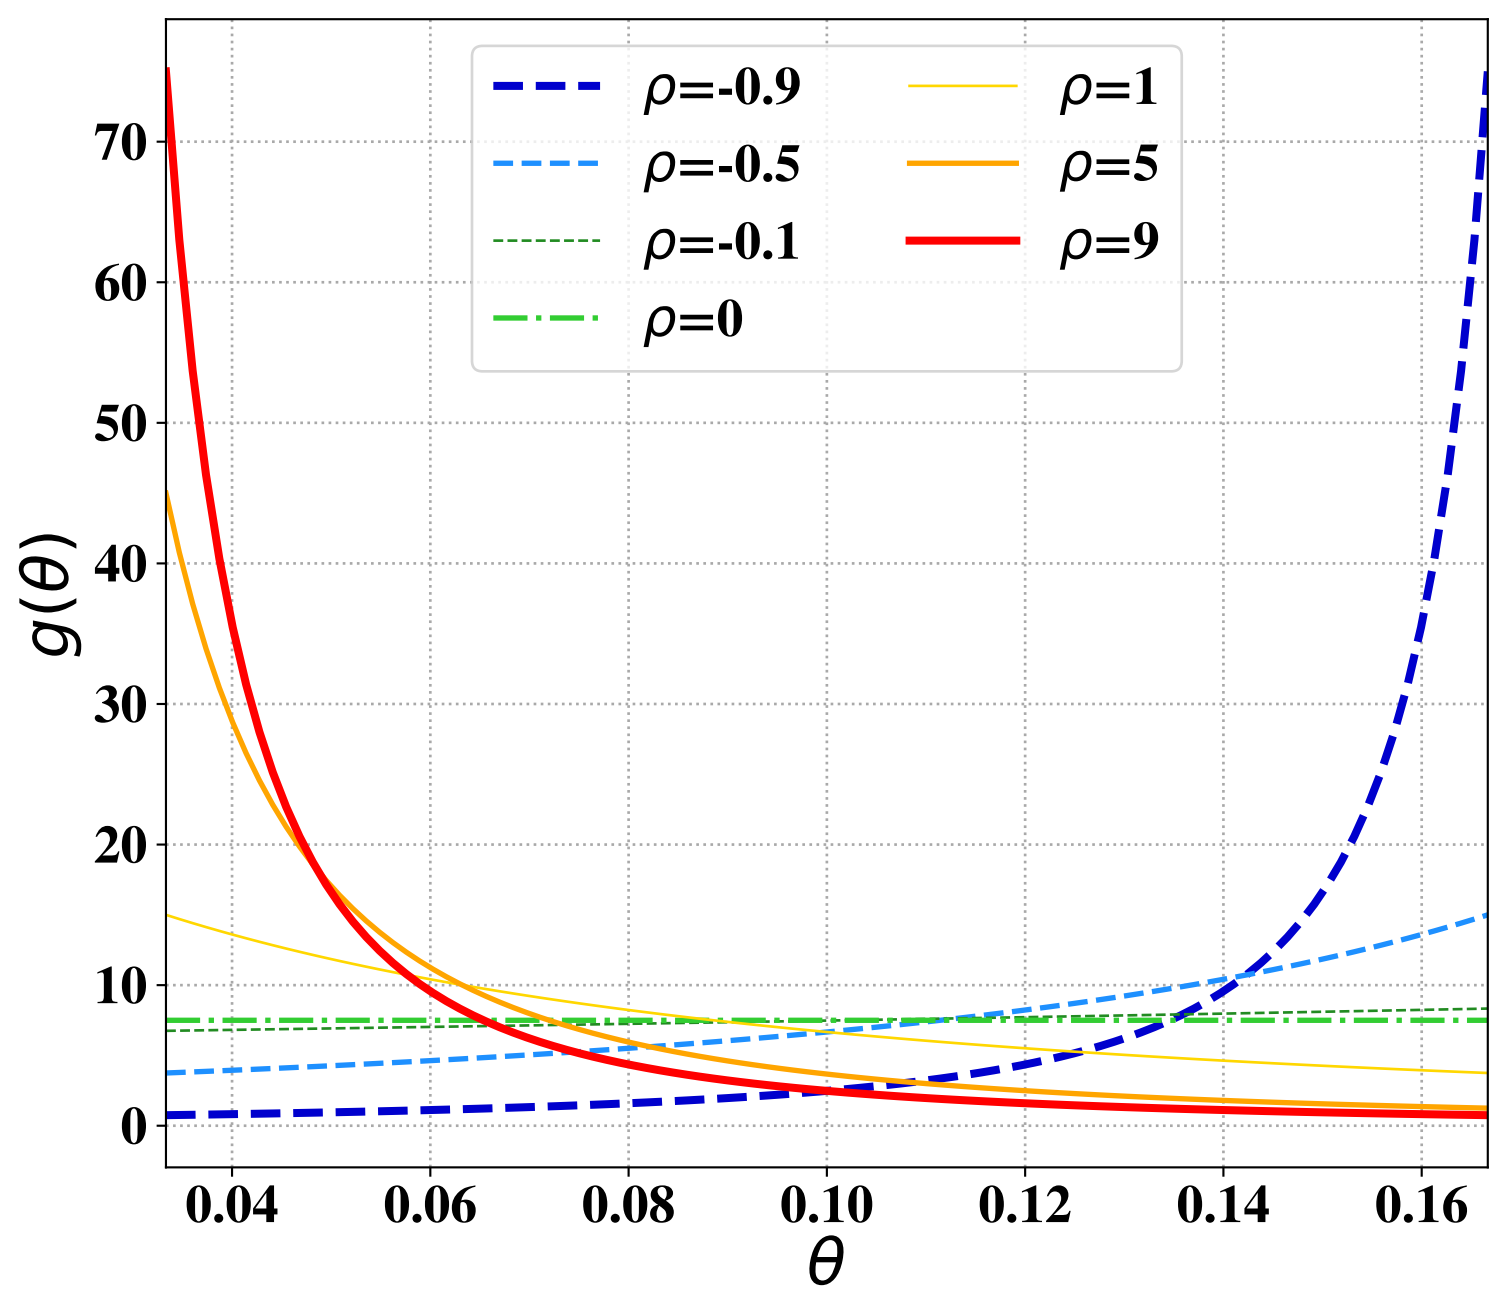

Supplement: opre.2024.0761.cd.zip [file rational_distribution.pdf › 2024.0761-1.0/results/figures/sens_dist/rational_distribution.pdf]

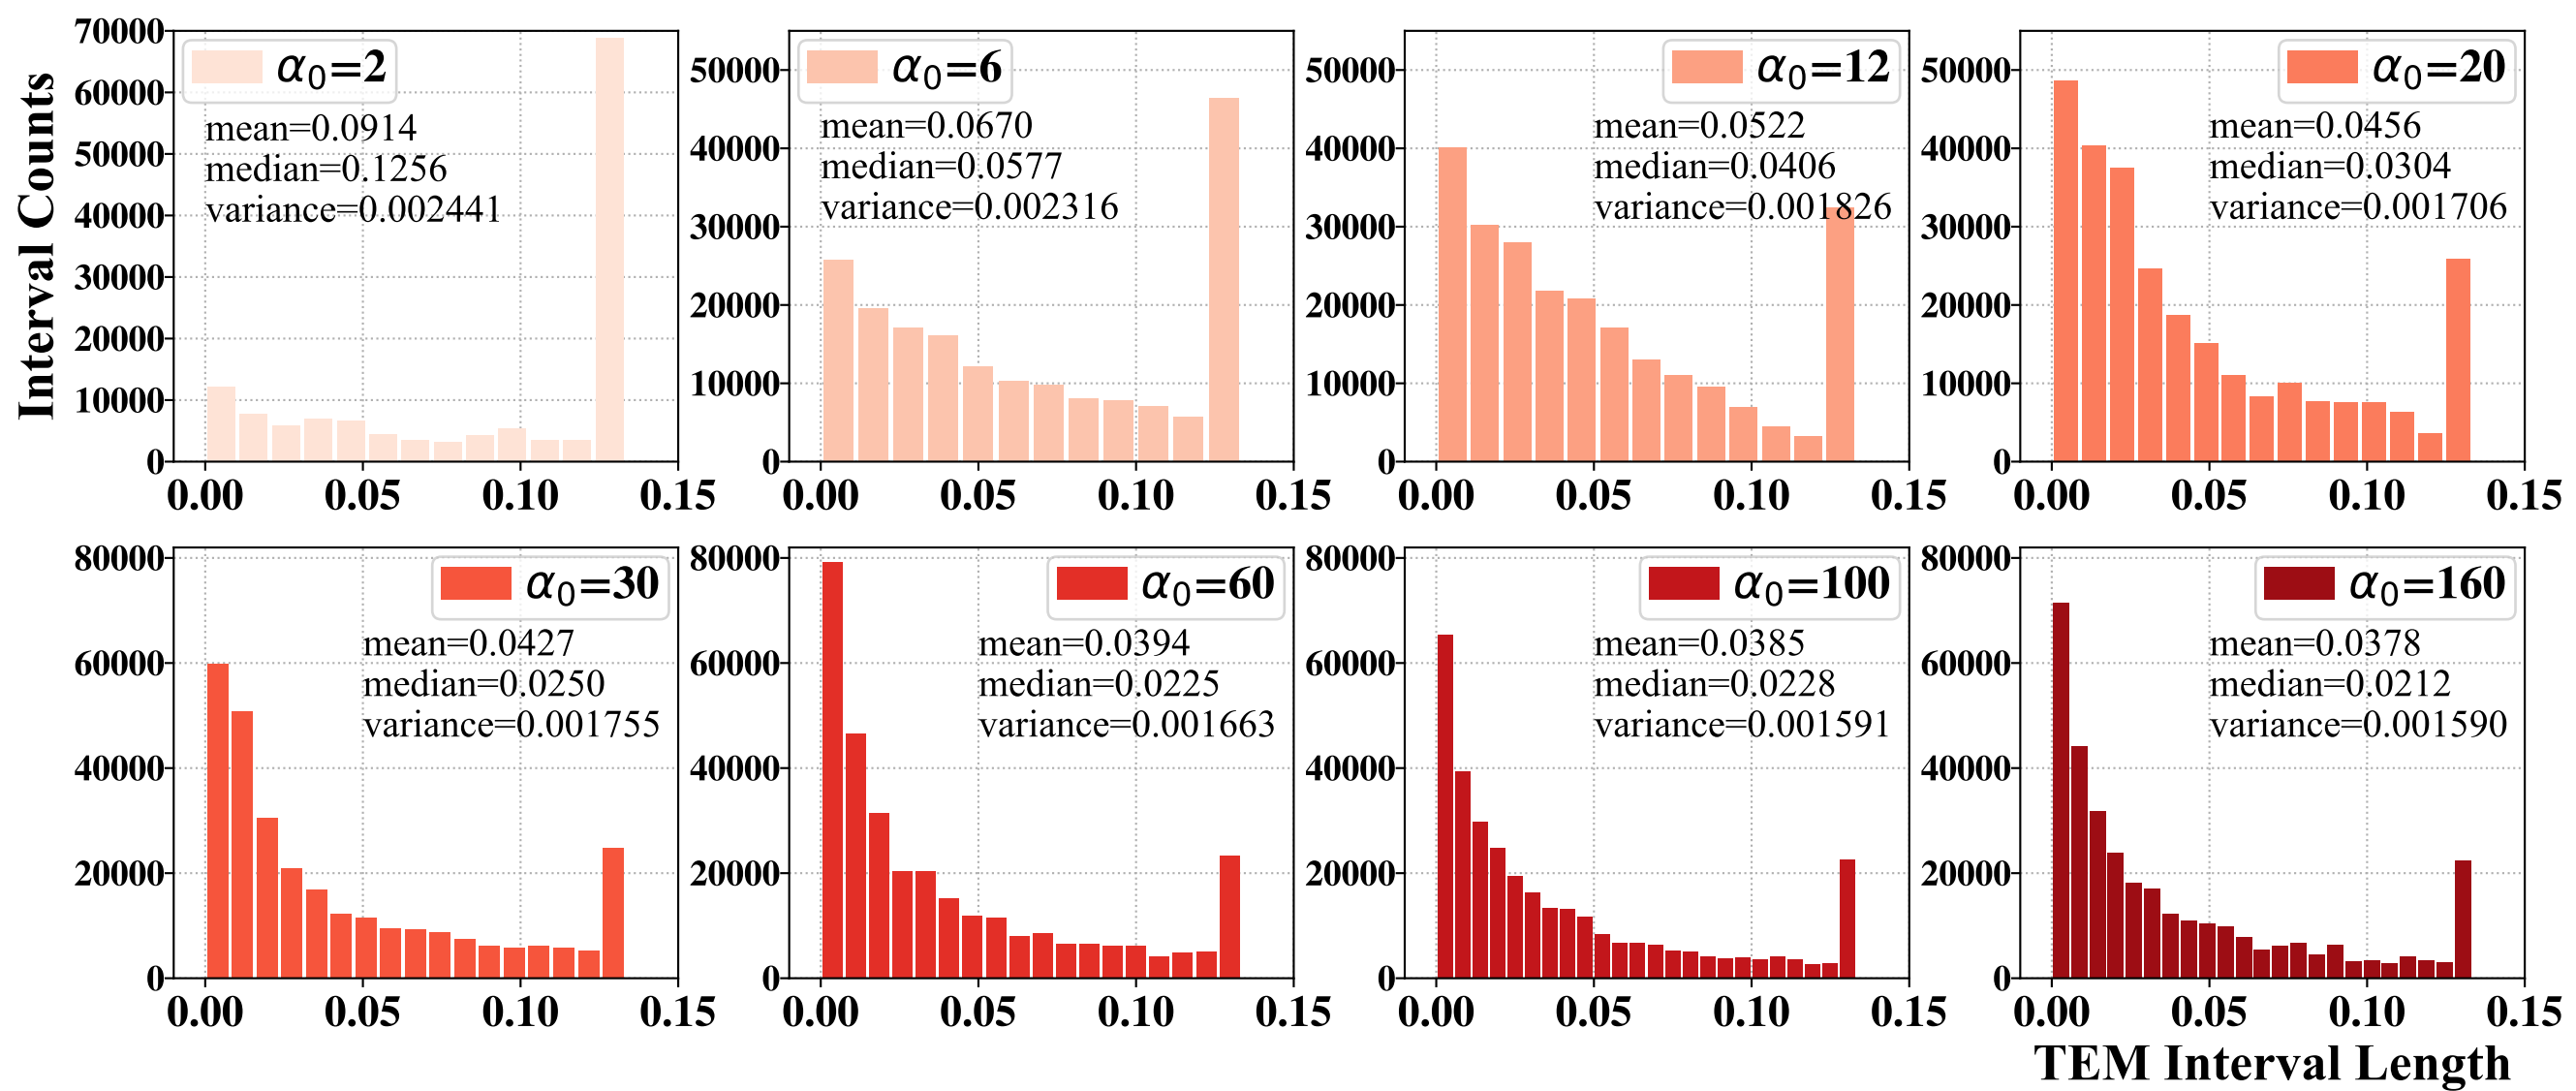

Supplement: opre.2024.0761.cd.zip [file boundarydiff_change.pdf › 2024.0761-1.0/results/figures/sens_toll_mag/boundarydiff_change.pdf]

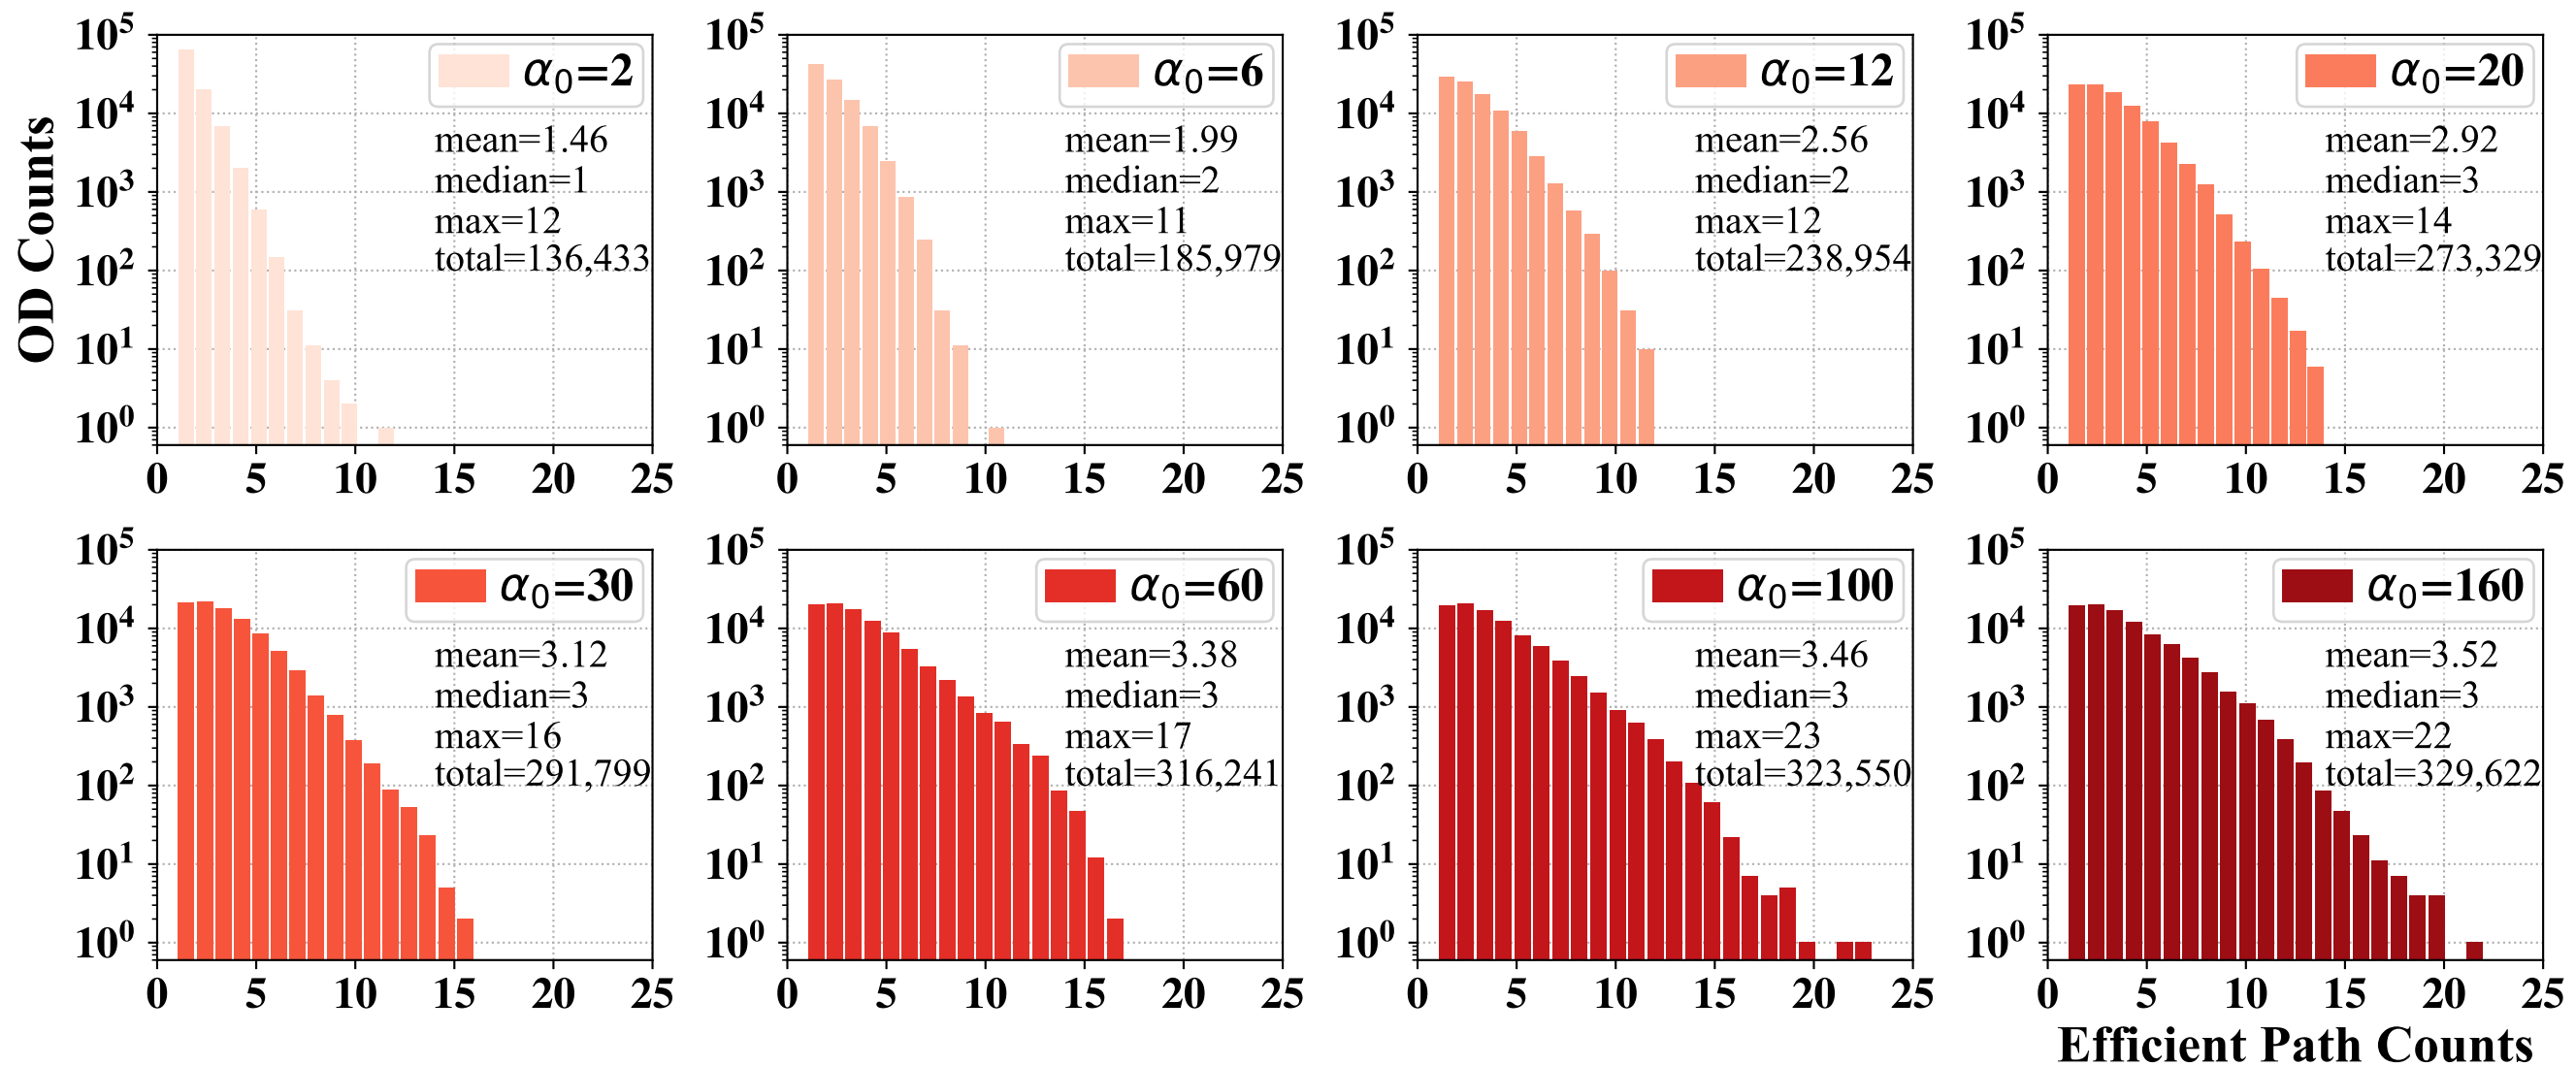

Supplement: opre.2024.0761.cd.zip [file efficientpath_change.pdf › 2024.0761-1.0/results/figures/sens_toll_mag/efficientpath_change.pdf]

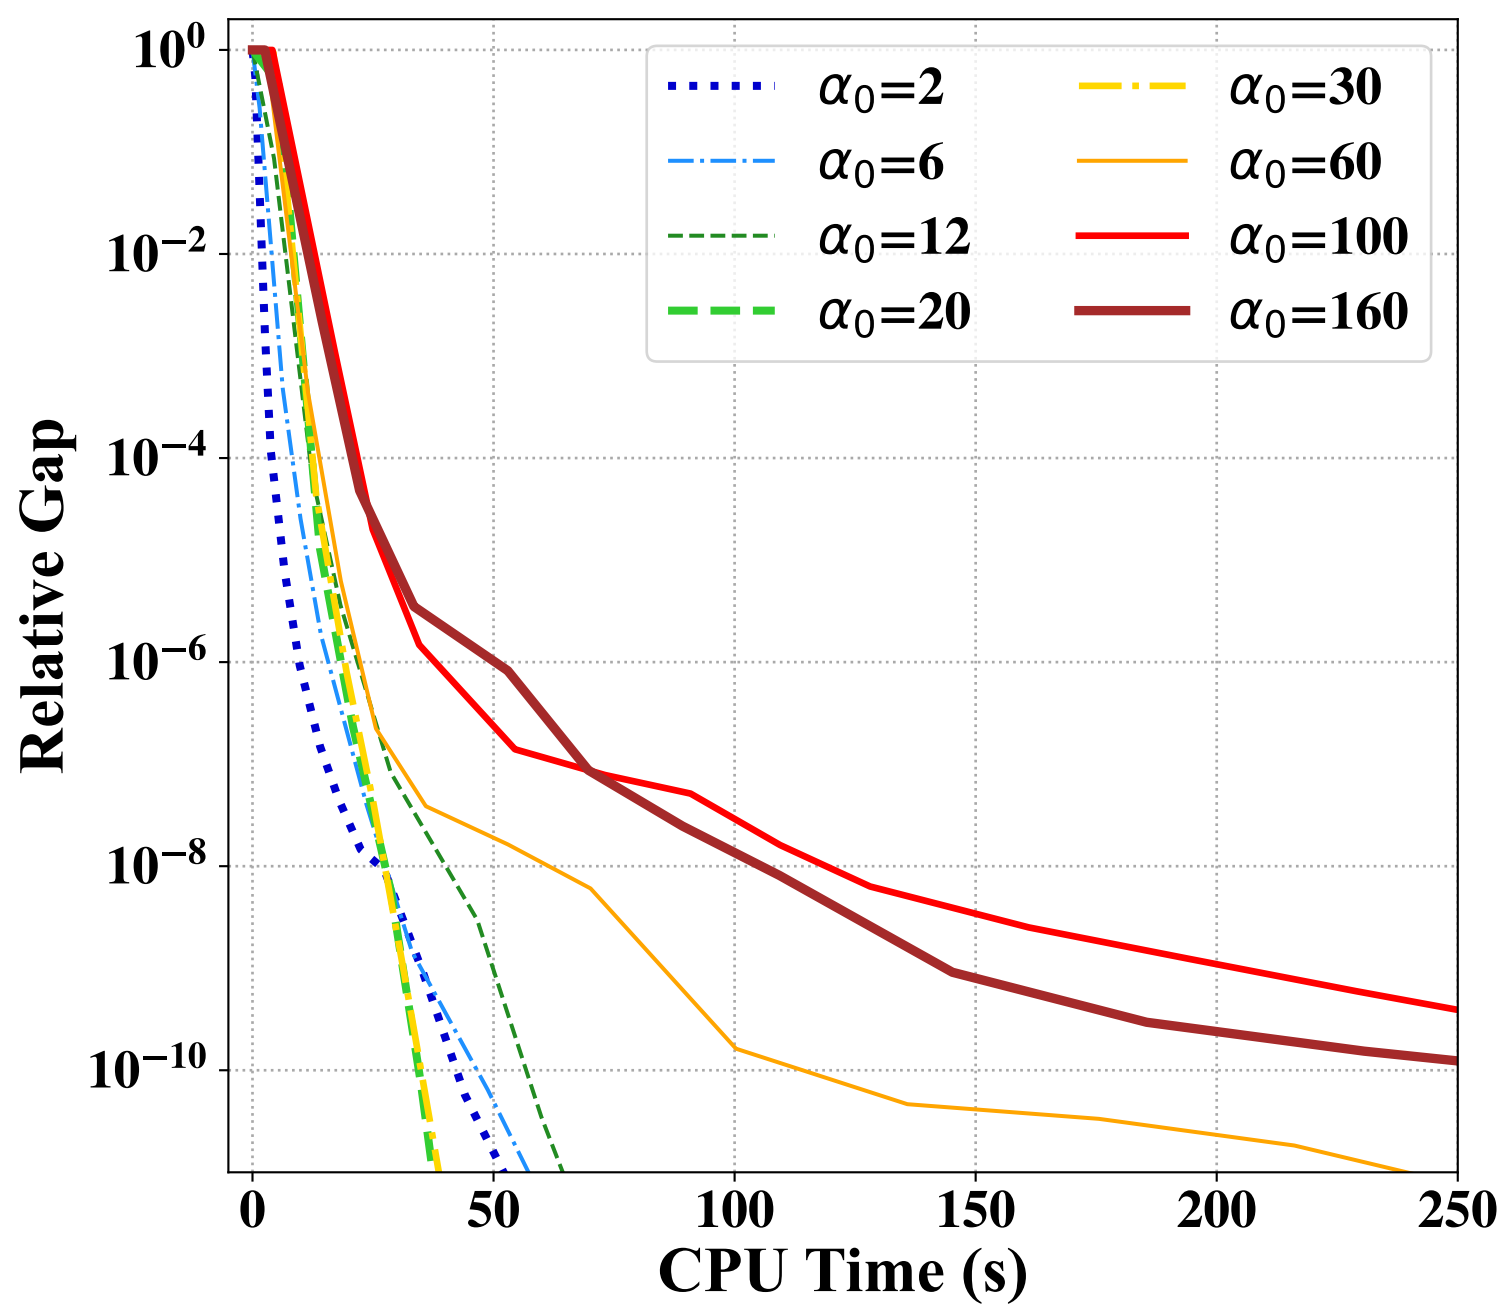

Supplement: opre.2024.0761.cd.zip [file toll_mag_conv.pdf › 2024.0761-1.0/results/figures/sens_toll_mag/toll_mag_conv.pdf]
